# Supplementary material
Source: PubMed Central journal article supplement (PMC4933298)
Supplement: NIHMS796385-supplement-SupplementalData12-7-15.pdf [file NIHMS796385-supplement-SupplementalData12-7-15.pdf]

**Supplemental Table 1. Diet Formulation**

| Ingredient              | LF   |      | HF   |      | HF-EP |      | HF-NEP |      | HF-EP+NEP |      | HF-GP |      |
|-------------------------|------|------|------|------|-------|------|--------|------|-----------|------|-------|------|
|                         | gm   | kcal | gm   | kcal | gm    | kcal | gm     | kcal | gm        | kcal | gm    | kcal |
| Casein                  | 190  | 758  | 234  | 936  | 234   | 935  | 233    | 933  | 233       | 932  | 233   | 933  |
| L-Cystine               | 2.8  | 11   | 3.5  | 14   | 3.5   | 14   | 3.5    | 14   | 3.5       | 14   | 3.5   | 14   |
| Corn Starch             | 480  | 1919 | 86   | 343  | 86    | 342  | 85     | 341  | 85        | 341  | 89    | 358  |
| Maltodextrin 10         | 118  | 474  | 110  | 440  | 110   | 439  | 110    | 438  | 109       | 438  | 110   | 438  |
| Fructose                | 0.0  | 0.0  | 26   | 102  | 26    | 102  | 26     | 102  | 26        | 102  | 0.0   | 0.0  |
| Dextrose, anhydrous     | 0.0  | 0.0  | 26   | 102  | 26    | 102  | 26     | 102  | 26        | 102  | 0.0   | 0.0  |
| Sucrose                 | 65   | 261  | 163  | 651  | 162   | 650  | 162    | 648  | 162       | 647  | 162   | 648  |
| Cellulose, BW200        | 47   | 0.0  | 47   | 0.0  | 47    | 0.0  | 47     | 0.0  | 47        | 0.0  | 47    | 0.0  |
| Soybean Oil             | 24   | 213  | 57   | 514  | 57    | 513  | 57     | 512  | 57        | 511  | 57    | 512  |
| Butter                  | 0.0  | 0.0  | 52   | 471  | 52    | 470  | 52     | 469  | 52        | 469  | 52    | 469  |
| Lard                    | 19   | 171  | 41   | 371  | 41    | 371  | 41     | 370  | 41        | 369  | 41    | 370  |
| Shortening              | 0.0  | 0.0  | 65   | 585  | 65    | 585  | 65     | 583  | 65        | 583  | 65    | 583  |
| Beef Tallow             | 0.0  | 0.0  | 24   | 214  | 24    | 214  | 24     | 213  | 24        | 213  | 24    | 213  |
| Mineral Mix, S10026     | 9.5  | 0.0  | 12   | 0.0  | 12    | 0.0  | 12     | 0.0  | 12        | 0.0  | 12    | 0.0  |
| DiCalcium Phosphate     | 12   | 0.0  | 15   | 0.0  | 15    | 0.0  | 15     | 0.0  | 15        | 0.0  | 15    | 0.0  |
| Calcium Carbonate       | 5.2  | 0.0  | 6.4  | 0.0  | 6.4   | 0.0  | 6.4    | 0.0  | 6.4       | 0.0  | 6.4   | 0.0  |
| Potassium Citrate       | 16   | 0.0  | 19   | 0.0  | 19.3  | 0.0  | 19     | 0.0  | 19        | 0.0  | 19    | 0.0  |
| Vitamin Mix, V10001     | 9.5  | 40   | 12   | 40   | 12    | 40   | 12     | 40   | 12        | 40   | 12    | 40   |
| Choline Bitartrate      | 1.9  | 0.0  | 2.3  | 0.0  | 2.3   | 0.0  | 2.3    | 0.0  | 2.3       | 0.0  | 2.3   | 0.0  |
| NEP Grape Fraction      | 0.0  | 0.0  | 0.0  | 0.0  | 0.0   | 0.0  | 3.5    | 0.0  | 3.5       | 0.0  | 0.0   | 0.0  |
| EP Grape Fraction       | 0.0  | 0.0  | 0.0  | 0.0  | 1.1   | 0.0  | 0.0    | 0.0  | 1.1       | 0.0  | 0.0   | 0.0  |
| Grape Powder            | 0.0  | 0.0  | 0.0  | 0.0  | 0.0   | 0.0  | 0.0    | 0.0  | 0.0       | 0.0  | 50    | 161  |
| FD&C Yellow Dye #5      | 0.0  | 0.0  | 0.0  | 0.0  | 0.0   | 0.0  | 0.1    | 0.0  | 0.0       | 0.0  | 0.0   | 0.0  |
| FD&C Red Dye #40        | 0.0  | 0.0  | 0.0  | 0.0  | 0.0   | 0.0  | 0.0    | 0.0  | 0.0       | 0.0  | 0.1   | 0.0  |
| FD&C Blue Dye #1        | 0.0  | 0.0  | 0.0  | 0.0  | 0.1   | 0.0  | 0.0    | 0.0  | 0.0       | 0.0  | 0.0   | 0.0  |
| Total                   | 1000 | 3847 | 1000 | 4783 | 1000  | 4778 | 1000   | 4767 | 1000      | 4761 | 1000  | 4741 |
|                         |      |      |      |      |       |      |        |      |           |      |       |      |
| total fat, kcals%       |      | 10   |      | 44   |       | 44   |        | 44   |           | 44   |       | 44   |
| sat. fat, kcal%         |      | 2.2  |      | 16   |       | 16   |        | 16   |           | 16   |       | 16   |
| monounsatur. fat, kcal% |      | 3.0  |      | 17   |       | 17   |        | 17   |           | 17   |       | 17   |
| polyunsatur. fat, kcal% |      | 4.7  |      | 11   |       | 11   |        | 11   |           | 11   |       | 11   |
| total sugars, kcal%     |      | 7.8  |      | 19   |       | 19   |        | 19   |           | 19   |       | 19   |

\*Numbers have been rounded up or down to optimize space constraints; LF, low fat control; HF, high fat sugar control; EP, extractable polyphenol fraction; NEP, non-extractable polyphenol fraction; GP, grape powder. EP and NEP are calorie free. GP contains 90% sugar w/w.

**Supplemental Table 2. Phenolic Composition of Grape Powder, Extractable Polyphenol (EP), and Non-Extractable (NEP) Fraction**

| Assay                                | grape powder | EP          | NEP         |
|--------------------------------------|--------------|-------------|-------------|
| Weight percentage (%)                | 100          | 2.26        | 6.91        |
| Total phenolics <sup>1</sup>         | 9.13         | 180.0 ± 1.3 | 10.5 ± 1.02 |
| Total anthocyanins <sup>2</sup>      | 0.33         | 37.8 ± 1.8  | ND          |
| Total proanthocyanidins <sup>3</sup> | 3.05         | 305.5 ± 7.0 | ND          |

<sup>1</sup>Total phenolics, mg/g DM as gallic acid equivalent (Folin Ciocalteau assay)

<sup>2</sup>Total anthocyanins, mg/g DM as cyaniding-3-*O*- glucoside equivalent (pH differential assay)

<sup>3</sup>Total proanthocyanidins, mg/g DM as procyanidin B2 equivalent (DMAC assay)

ND = not detectable

**Supplemental Table 3. Principal Component Analysis of OTUs between Dietary Groups.**

| <b>HF vs HF+EP</b>                                                                                |                    |
|---------------------------------------------------------------------------------------------------|--------------------|
| <b>PC1</b>                                                                                        | <b>Correlation</b> |
| Firmicutes; Bacilli; Lactobacillales; Lactobacillaceae; Lactobacillus                             | 0.67               |
| Firmicutes; Clostridia; Clostridiales; Peptococcaceae; rc4-4                                      | -0.77              |
| <b>PC2</b>                                                                                        |                    |
| Actinobacteria; Actinobacteria; Bifidobacteriales; Bifidobacteriaceae; Bifidobacterium            | -0.65              |
| Firmicutes; Bacilli; Lactobacillales; Lactobacillaceae; Lactobacillus                             | -0.63              |
| Firmicutes; Clostridia; Clostridiales; Other; Other                                               | 0.79               |
| Firmicutes; Clostridia; Clostridiales; Ruminococcaceae; Oscillospira                              | 0.74               |
| Firmicutes; Erysipelotrichi; Erysipelotrichales; Erysipelotrichaceae; Allobaculum                 | -0.71              |
| <b>HF vs HF+NEP</b>                                                                               |                    |
| <b>PC1</b>                                                                                        |                    |
| Bacteria; Verrucomicrobia; Verrucomicrobiae; Verrucomicrobiales; Verrucomicrobiaceae; Akkermansia | -0.88              |
| <b>PC2</b>                                                                                        |                    |
| Bacteroidetes; Bacteroidia; Bacteroidales; S24-7                                                  | 0.61               |
| Firmicutes; Bacilli; Lactobacillales; Lactobacillaceae; Lactobacillus                             | -0.71              |
| Firmicutes; Clostridia; Clostridiales; Ruminococcaceae                                            | 0.92               |
| Firmicutes; Erysipelotrichi; Erysipelotrichales; Erysipelotrichaceae; Allobaculum                 | -0.69              |
| <b>HF vs HF+EP-NEP</b>                                                                            |                    |
| <b>PC1</b>                                                                                        |                    |
| Actinobacteria; Actinobacteria; Bifidobacteriales; Bifidobacteriaceae; Bifidobacterium            | -0.73              |
| Bacteroidetes; Bacteroidia; Bacteroidales; S24-7                                                  | 0.71               |
| Firmicutes; Clostridia; Clostridiales; Clostridiaceae                                             | 0.65               |
| Firmicutes; Clostridia; Clostridiales; Ruminococcaceae                                            | 0.88               |
| Firmicutes; Erysipelotrichi; Erysipelotrichales; Erysipelotrichaceae; Allobaculum                 | -0.91              |
| <b>PC2</b>                                                                                        |                    |
| Actinobacteria; Actinobacteria; Bifidobacteriales; Bifidobacteriaceae; Bifidobacterium            | 0.68               |
| Firmicutes; Clostridia; Clostridiales; Other; Other                                               | -0.88              |
| <b>HF vs HF+Grape</b>                                                                             |                    |
| <b>PC1</b>                                                                                        |                    |
| Firmicutes; Clostridia; Clostridiales; Ruminococcaceae                                            | 0.67               |
| Firmicutes; Clostridia; Clostridiales                                                             | 0.65               |
| <b>PC2</b>                                                                                        |                    |
| Firmicutes; Clostridia; Clostridiales; Lachnospiraceae; Ruminococcus; gnavus                      | 0.74               |
| Firmicutes; Clostridia; Clostridiales; Clostridiaceae                                             | 0.8                |
| Firmicutes; Erysipelotrichi; Erysipelotrichales; Allobaculum                                      | -0.6               |

**Supplemental Figure 1**

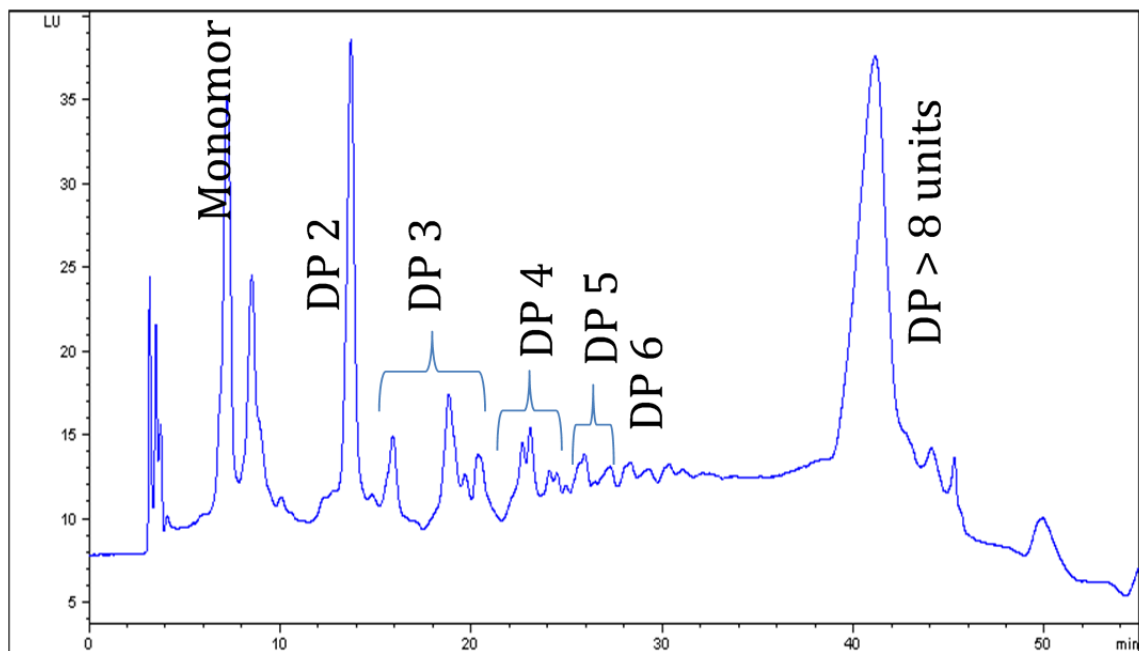

**Supplemental Figure 1.** Proanthocyanin degree of polymerization in EP fraction. NP-HPLC-FLD chromatogram (excitation 230 nm, emission 320 nm) for proanthocyanidins showing degree of polymerization (DP) in extractable polyphenol (EP) from grapes.

## Supplemental Figure 2

### A-Ileum

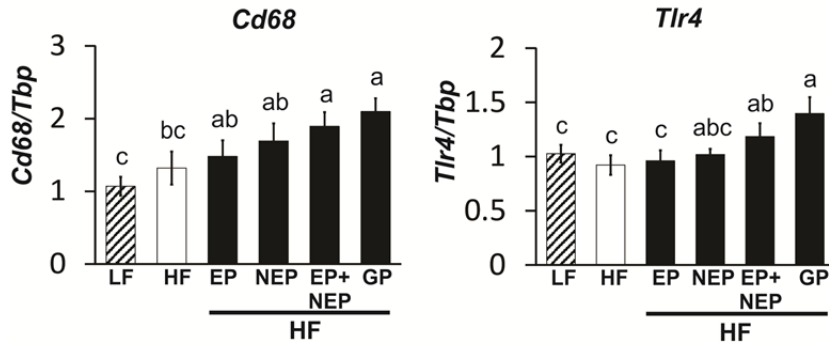

### B-P. Colon

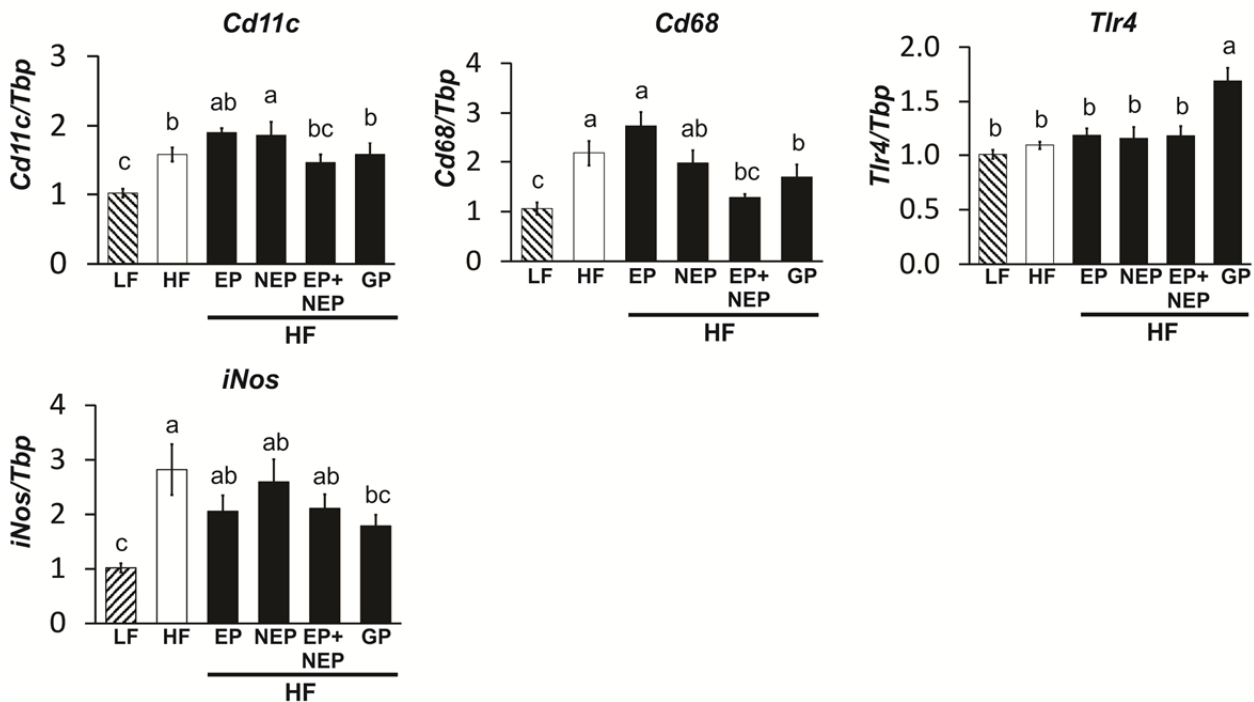

**Supplemental Figure 2.** The expression of markers of inflammation in the (A) ileum and (B) proximal colon of C57BL/6J mice fed a low fat (LF), high fat (HF) diet, or a HF diet containing extractable (HF-EP) or non-extractable (HF-NEP) polyphenols, an equal combination of the EP and NEP fractions (HF-EP+NEP), or grape powder (HF-GP) for 16 weeks. qPCR was conducted to measure mRNA abundance of genes associated with inflammation.. Means  $\pm$  SEM (n=9-10) without a common lowercase letter differ ( $p < 0.05$ ) using one-way ANOVA and Student's t test.

### Supplemental Figure 3

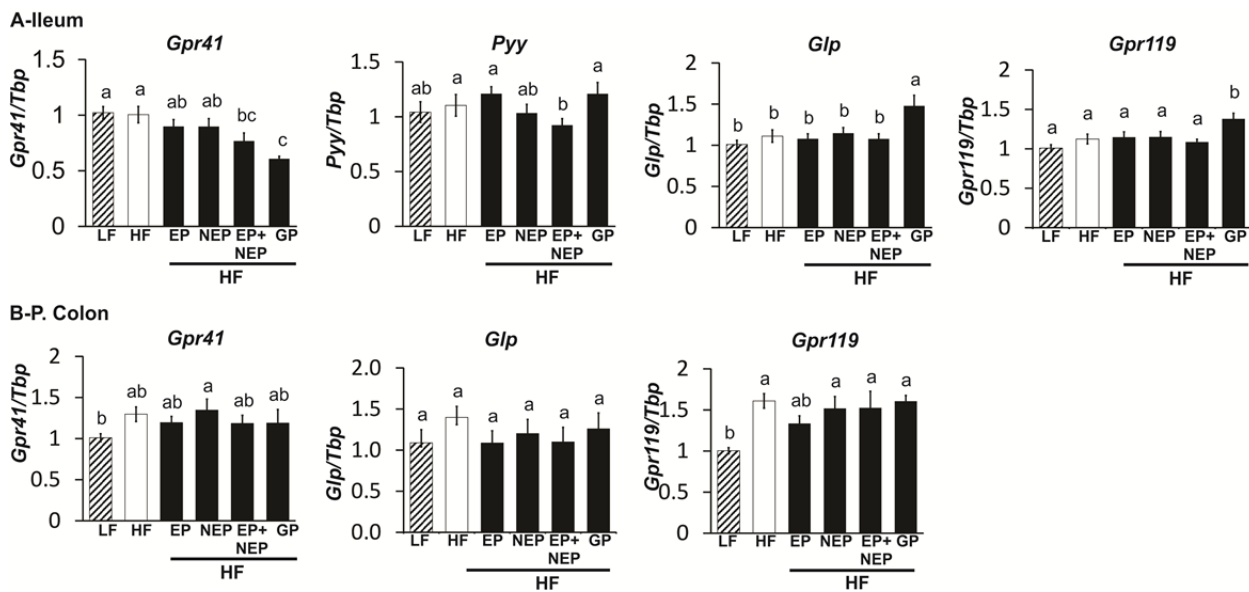

**Supplemental Figure 3.** The expression of G-protein receptors (*Gpr* 41 and 119, peptide YY (*Pyy*), and glucagon like protein (*Glp*) were measured as markers of SCFA regulation in the (A) ileum and (B) proximal colon mucosa of C57BL/6J mice fed a low fat (LF), high fat (HF) diet, or a HF diet containing extractable (HF-EP) or non-extractable (HF-NEP) polyphenols, an equal combination of the EP and NEP fractions (HF-EP+NEP), or grape powder (HF-GP) for 16 weeks. qPCR was conducted to measure mRNA abundance of genes associated with regulation of energy intake in ileum mucosa and proximal colon mucosa. Means  $\pm$  SEM (n=9-10) without a common lowercase letter differ ( $p < 0.05$ ) using one-way ANOVA and Student's test.

**Supplemental Figure 4.**

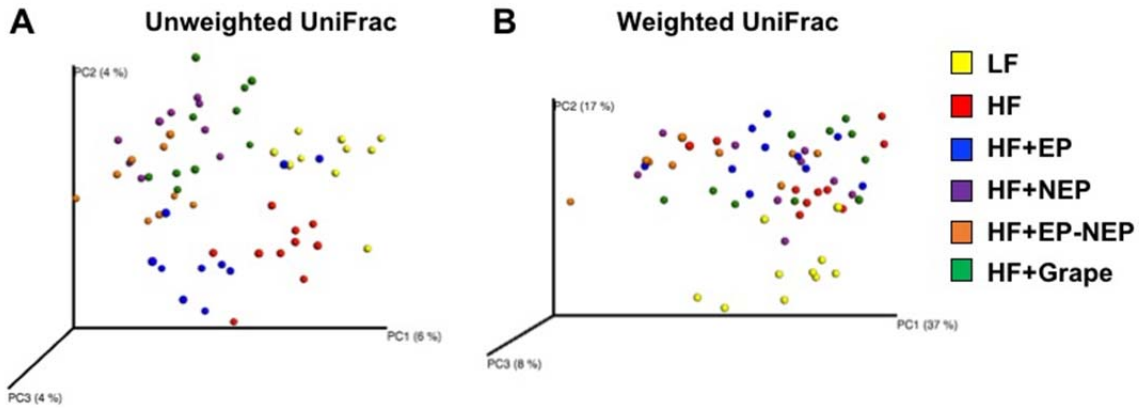

**Supplemental Figure 4.** PCoA plots of unweighted (A) and weighted (B) UniFrac distances of C57BL/6J mice fed a low fat (LF), high fat (HF) diet, or a HF diet containing extractable (HF-EP) or non-extractable (HF-NEP) polyphenols, an equal combination of the EP and NEP fractions (HF-EP+NEP), or grape powder (HF-GP) for 16 weeks.

## Supplemental Figure 5.

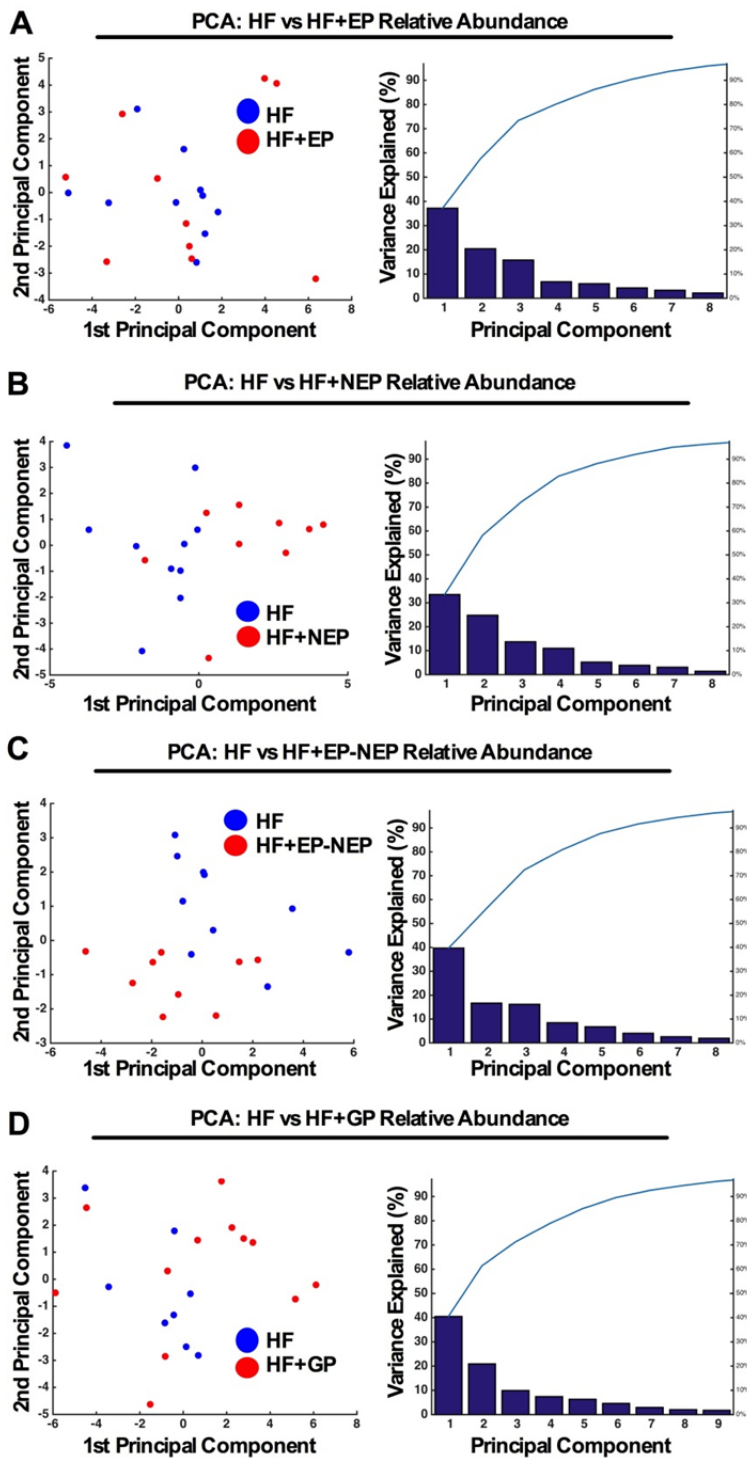

**Supplemental Figure 5.** The microbial relative abundances of C57BL/6J mice fed a low fat (LF), high fat (HF) diet, or a HF diet containing extractable (HF-EP) or non-extractable (HF-NEP) polyphenols, an



equal combination of the EP and NEP fractions (HF-EP+NEP), or grape powder (HF-GP) for 16 weeks. (A) Top Left - PCA plot between low fat (LF), high fat + extractable polyphenols (HF-EP), high fat + non-extractable polyphenols (HF-NEP), high fat + extractable and nonextractable polyphenols (HF-EP+NEP), and HF+Grape Powder (HF-GP). A) Left Side – PCA plot showing percentage of variance in Relative Abundances across diets explained by principal components. Right Side – Pareto plot showing percentage of variance explained by principal components. (B) Same as A, but showing PCA of HF vs HF-EP groups; (C) HF vs HF-NEP, and (D) HF vs HF-EP+NEP.
